# Supplementary material
Source: publisher figshare collection journal article supplement (https://acs.figshare.com/ndownloader/files/11026718)
Supplement: Supplementary file 1 [file 11026718]

# Enhanced tribocorrosion performance of Cr/GLC multilayered films for marine protective application

*Lei Li<sup>a,b,1</sup>, Lin-Lin Liu<sup>a,1</sup>, Xiaowei Li<sup>a</sup>, Peng Guo<sup>a</sup>, Peiling Ke<sup>a\*</sup>, Aiying Wang<sup>a\*</sup>*

<sup>a</sup> Key Laboratory of Marine Materials and Related Technologies, Zhejiang Key

Laboratory of Marine Materials and Protective Technologies, Ningbo Institute of

Materials Technology and Engineering, Chinese Academy of Sciences, Ningbo, 315201,

China

<sup>b</sup>University of Chinese Academy of Sciences, Beijing, 100049, China

## Corresponding Authors

### \*Peiling Ke

Tel: 86-574-86685170; Fax: 86-574-86685159. E-mail: kepl@nimte.ac.cn

### \*Aiying Wang

Tel: 86-574-86685170; Fax: 86-574-86685159. E-mail: aywang@nimte.ac.cn

---

<sup>1</sup>These authors contributed to this work equally.

\* Corresponding authors.

E-mail addresses: [kepl@nimte.ac.cn](mailto:kepl@nimte.ac.cn) (P. Ke) , [aywang@nimte.ac.cn](mailto:aywang@nimte.ac.cn) (A. Wang)

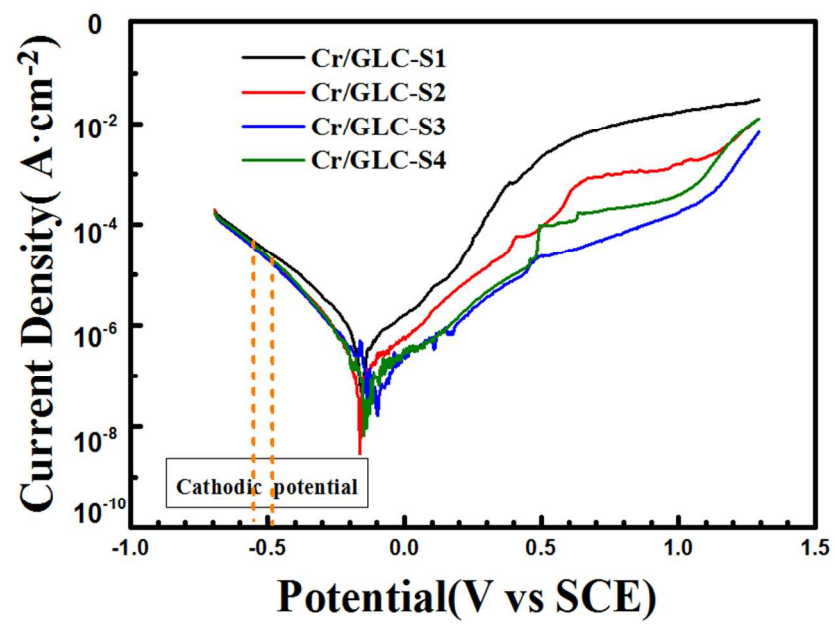

**Figure S<sub>1</sub>** Potentiodynamic polarization curves of Cr/GLC multilayered films in artificial seawater.

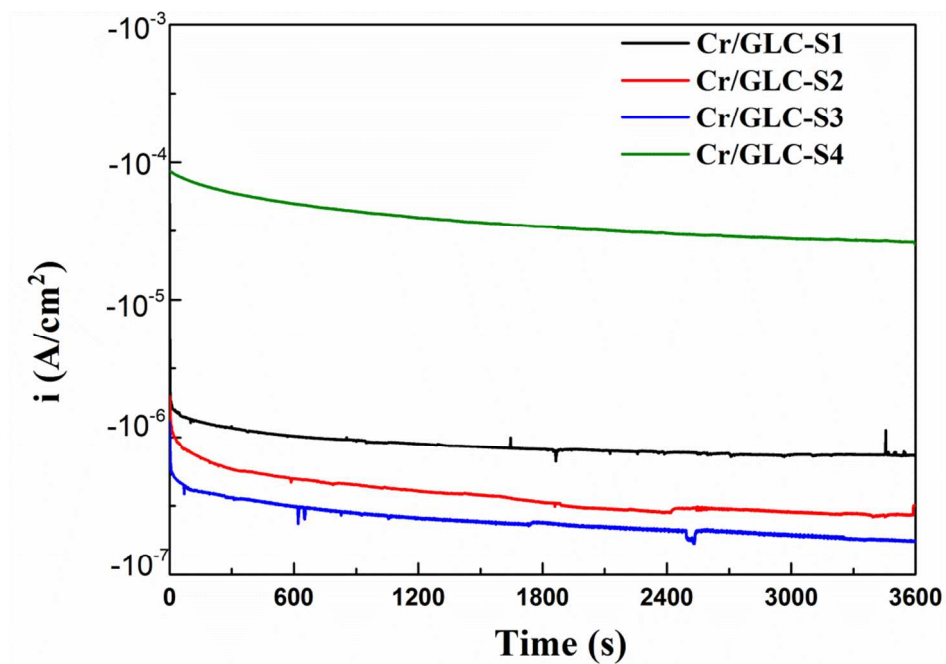

**Figure S<sub>2</sub>** Current evolution curves of Cr/GLC multilayered films under cathodic protection condition.

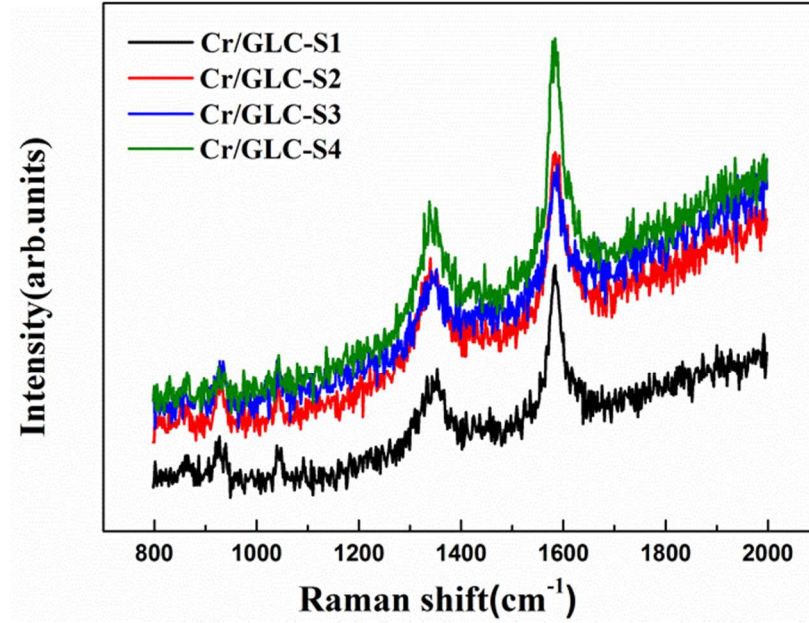

**Figure S<sub>3</sub>** Raman spectra of the transferred tribofilms on the wear scars of  $\text{Si}_3\text{N}_4$  balls.

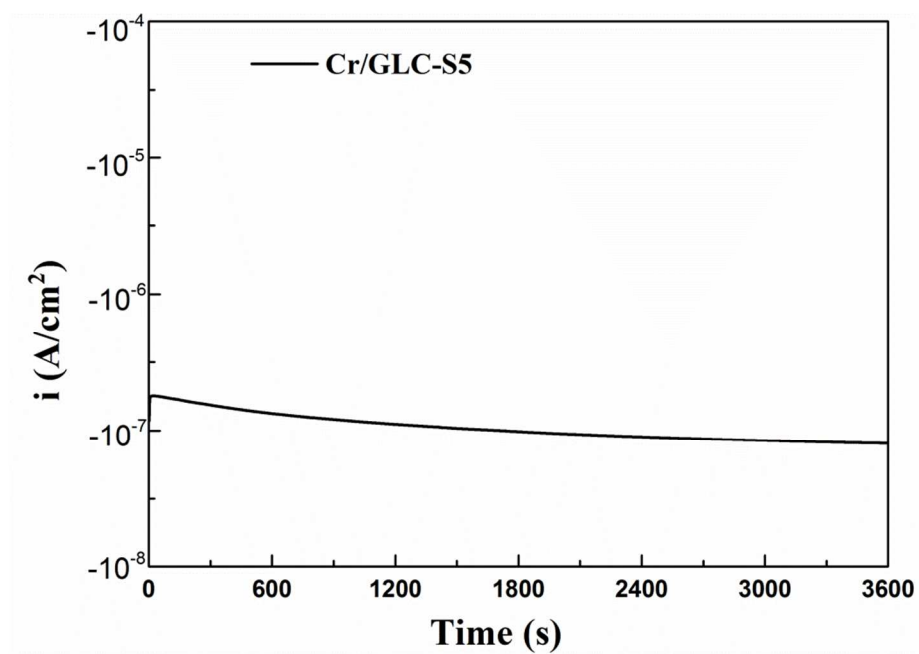

**Figure S<sub>4</sub>** Current evolution curves of Cr/GLC-S5 multilayered films under cathodic protection condition

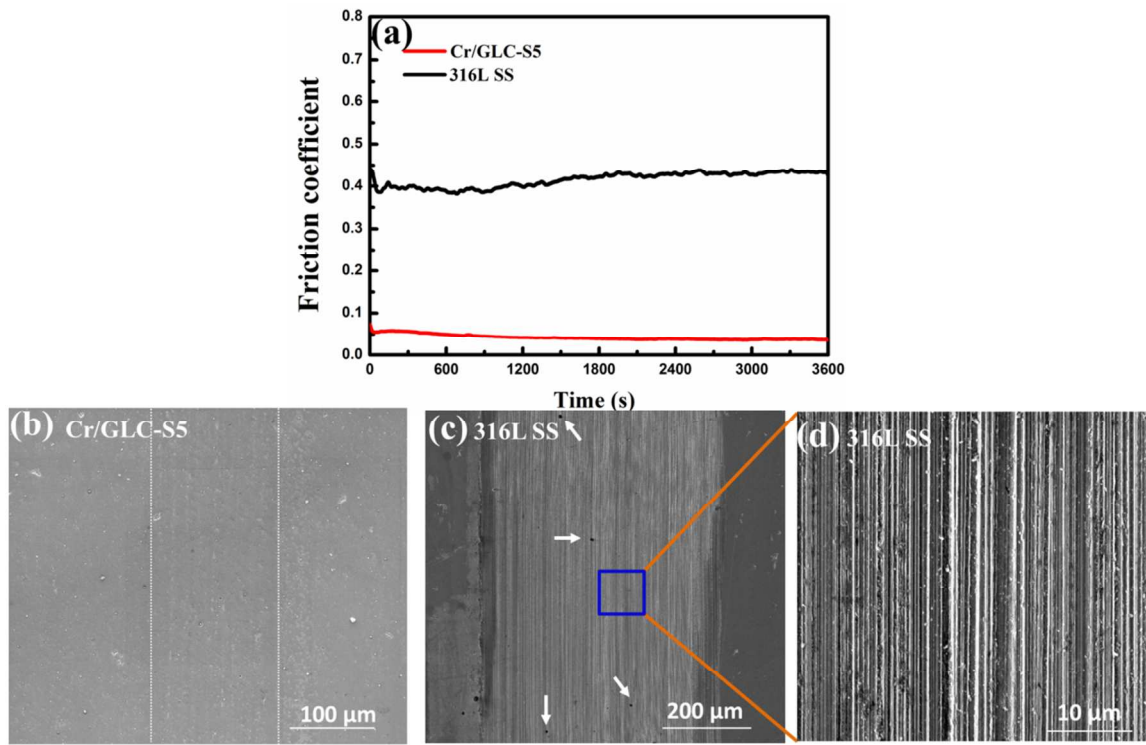

**Figure S<sub>5</sub>** Friction coefficients and (b, c) surface morphologies of wear tracks of the Cr/GLC-S5 multilayered film and uncoated 316L SS.
